# Supplementary material
Source: PubMed Central journal article supplement (PMC9869870)
Supplement: ehp11292.s001.acco.pdf [file ehp11292.s001.acco.pdf]

**Note to readers with disabilities:** *EHP* strives to ensure that all journal content is accessible to all readers. However, some figures and Supplemental Material published in *EHP* articles may not conform to [508 standards](#) due to the complexity of the information being presented. If you need assistance accessing journal content, please contact [ehp508@niehs.nih.gov](mailto:ehp508@niehs.nih.gov). Our staff will work with you to assess and meet your accessibility needs within 3 working days.

### **Supplemental Material**

#### **Estimated Transfer of Perfluoroalkyl Substances (PFAS) from Maternal Serum to Breast Milk in Women Highly Exposed from Contaminated Drinking Water: A Study in the Ronneby Mother–Child Cohort**

Annelise J. Blomberg, Erika Norén, Line S. Haug, Christian Lindh, Azemira Sabaredzovic, Daniela Pineda, Kristina Jakobsson, and Christel Nielsen

#### **Table of Contents**

**Table S1.** Between-run precision for four quality control (QC) samples and between-batch precision for 164 duplicate samples, expressed as the mean and coefficient of variation (CV, %).

**Table S2.** Study population characteristics for women who did vs. did not provide provide at least one milk sample, limited to the 211 women with a serum delivery sample and displayed as either N (%) or Mean  $\pm$  SD.

**Table S3.** Serum PFAS concentrations at delivery for women who did vs. did not provide provide at least one milk sample, limited to the 211 women with a serum delivery sample and displayed as median [IQR] or N (%).

**Table S4.** PFAS concentrations (ng/ml) by location of maternal care and sample matrix.

**Table S5.** Serum PFHxS cutoffs for each exposure group.

**Table S6.** Serum PFAS concentrations (ng/ml) by exposure group.

**Table S7.** Colostrum PFAS concentrations (ng/ml) by exposure group.

**Table S8.** Breastmilk PFAS concentrations (ng/ml) by exposure group.

**Table S9.** The average relative contribution of each PFAS to the sum of PFAS (PFOA, PFNA, PFDA, PFUnDA, PFHxS, PFHpS and PFOS), by matrix and exposure category.

**Table S10.** Estimated transfer efficiency (TE, 95% CI) by PFAS and lactation stage, calculated from a mixed-effects model with an interaction term between PFAS compound and lactation stage ( $N_{\text{participants}} = 126$  and  $N_{\text{observations}} = 776$ ). P-values are comparing transfer efficiency by lactation stage for each PFAS compound.

**Table S11.** Estimated transfer efficiency (TE, 95% CI) from serum into colostrum ( $TE_{C:S}$ ) by PFAS and exposure level, calculated from a mixed-effects model with an interaction term between PFAS and exposure group ( $N_{\text{participants}} = 85$  and  $N_{\text{observations}} = 340$ ). P-values are for each PFAS compound and are relative to the background exposure group.

**Table S12.** Estimated transfer efficiency (TE, 95% CI) from serum into breastmilk ( $TE_{B:S}$ ) by PFAS and exposure level, calculated from a mixed-effects model with an interaction term between PFAS and exposure group ( $N_{\text{participants}} = 109$  and  $N_{\text{observations}} = 436$ ). P-values are for each PFAS compound and are relative to the background exposure group.

**Figure S1.** Exposure category cutoffs by serum PFHxS concentrations, illustrated by area (Ronneby:  $n = 103$ ; Karlshamn:  $n = 23$ ).

**Figure S2.** Serum PFAS concentrations by area (Ronneby:  $n = 103$ ; Karlshamn:  $n = 23$ ).

**Figure S3.** Spearman correlations across PFAS and matrices ( $N_{\text{participants}} = 126$  and  $N_{\text{observations}} = 2240$ ).

**Figure S4.** Spearman correlations across PFAS and matrices, limited to participants in the intermediate and high exposure groups ( $N_{\text{participants}} = 101$  and  $N_{\text{observations}} = 1827$ ).

**Figure S5.** Spearman correlations across PFAS and matrices, limited to participants in the background exposure group ( $N_{\text{participants}} = 25$  and  $N_{\text{observations}} = 239$ ). Because of the small sample size, this correlation plot excludes PFAS measurements where the majority of measurements were less than the LOQ.

## Supplemental Tables

**Table S1:** Between-run precision for four quality control (QC) samples and between-batch precision for 164 duplicate samples, expressed as the mean and coefficient of variation (CV, %).

| PFAS          | QC1  | QC2  | QC3  | QC4   | Duplicate |
|---------------|------|------|------|-------|-----------|
| <b>PFOA</b>   |      |      |      |       |           |
| Mean          | 1.7  | 2.2  | 69.5 | 134.4 | 3.5       |
| CV            | 14   | 10   | 12   | 11    | 14        |
| <b>PFNA</b>   |      |      |      |       |           |
| Mean          | 1.4  | 1.4  | 2    | 131   | 0.4       |
| CV            | 17   | 12   | 15   | 14    | 16        |
| <b>PFDA</b>   |      |      |      |       |           |
| Mean          | 0.4  | 0.4  | 0.7  | 119   | 0.2       |
| CV            | 24   | 18   | 15   | 12    | 30        |
| <b>PFHxS</b>  |      |      |      |       |           |
| Mean          | 8.8  | 15.1 | 916  | 109   | 48.1      |
| CV            | 8    | 8    | 7    | 8     | 7         |
| <b>PFOS</b>   |      |      |      |       |           |
| Mean          | 12.7 | 19.1 | 1230 | 129   | 45        |
| CV            | 11   | 8    | 8    | 8     | 11        |
| <b>PFUnDA</b> |      |      |      |       |           |
| Mean          | 0.5  | 0.5  | 0.6  | 114   | 0.2       |
| CV            | 21   | 20   | 18   | 13    | 36        |
| <b>PFHpS</b>  |      |      |      |       |           |
| Mean          | 0.5  | 0.8  | 74.6 | 0.3   | 1.4       |
| CV            | 23   | 17   | 13   | 28    | 15        |

**Table S2:** Study population characteristics for women who did vs. did not provide provide at least one milk sample, limited to the 211 women with a serum delivery sample and displayed as either N (%) or Mean  $\pm$  SD

| Characteristic               | At least one milk sample | No milk samples  |
|------------------------------|--------------------------|------------------|
| N                            | 126                      | 85               |
| Maternal Age at Delivery     | 30.71 $\pm$ 4.74         | 29.37 $\pm$ 4.69 |
| Year of Delivery             |                          |                  |
| 2015                         | 6 (4.8)                  | 7 (8.2)          |
| 2016                         | 27 (21.4)                | 21 (24.7)        |
| 2017                         | 32 (25.4)                | 15 (17.6)        |
| 2018                         | 31 (24.6)                | 14 (16.5)        |
| 2019                         | 27 (21.4)                | 24 (28.2)        |
| 2020                         | 3 (2.4)                  | 1 (1.2)          |
| Missing                      | 0 (0.0)                  | 3 (3.5)          |
| Parity = Multiparous         | 77 (61.6)                | 48 (60.8)        |
| Smoking Status               |                          |                  |
| Never Smoker                 | 80 (63.5)                | 37 (43.5)        |
| Current Smoker               | 7 (5.6)                  | 3 (3.5)          |
| Past Smoker                  | 32 (25.4)                | 27 (31.8)        |
| Missing                      | 7 (5.6)                  | 18 (21.2)        |
| Education Status             |                          |                  |
| Less than high school        | 3 (2.4)                  | 5 (5.9)          |
| High school                  | 51 (40.5)                | 40 (47.1)        |
| University (3 or more years) | 63 (50.0)                | 21 (24.7)        |
| Other                        | 3 (2.4)                  | 1 (1.2)          |
| Missing                      | 6 (4.8)                  | 18 (21.2)        |
| Location of Maternal Care    |                          |                  |
| Karlshamn                    | 23 (18.3)                | 7 (8.2)          |
| Ronneby                      | 103 (81.7)               | 75 (88.2)        |
| Missing                      | 0 (0.0)                  | 3 (3.5)          |

**Table S3:** Serum PFAS concentrations at delivery for women who did vs. did not provide provide at least one milk sample, limited to the 211 women with a serum delivery sample and displayed as median [IQR] or N (%)

| Characteristic | At least one milk sample | No milk samples     |
|----------------|--------------------------|---------------------|
| N              | 126                      | 85                  |
| PFOA, ng/ml    | 1.31 [0.84, 2.60]        | 2.15 [1.22, 3.25]   |
| PFOA, N>LOQ    | 126 (100.0)              | 85 (100.0)          |
| PFNA, ng/ml    | 0.38 [0.26, 0.52]        | 0.36 [0.26, 0.46]   |
| PFNA, N>LOQ    | 125 (99.2)               | 85 (100.0)          |
| PFDA, ng/ml    | 0.22 [0.15, 0.32]        | 0.21 [0.15, 0.29]   |
| PFDA, N>LOQ    | 118 (93.7)               | 80 (94.1)           |
| PFUnDA, ng/ml  | 0.20 [0.15, 0.32]        | 0.18 [0.12, 0.26]   |
| PFUnDA, N>LOQ  | 114 (90.5)               | 73 (85.9)           |
| PFHxS, ng/ml   | 6.02 [0.88, 26.12]       | 12.91 [4.20, 35.33] |
| PFHxS, N>LOQ   | 126 (100.0)              | 85 (100.0)          |
| PFHpS, ng/ml   | 0.42 [0.10, 1.74]        | 0.86 [0.24, 2.07]   |
| PFHpS, N>LOQ   | 96 (76.2)                | 71 (83.5)           |
| PFOS, ng/ml    | 11.29 [3.81, 36.58]      | 22.84 [6.47, 50.57] |
| PFOS, N>LOQ    | 126 (100.0)              | 85 (100.0)          |

**Table S4:** PFAS concentrations (ng/ml) by location of maternal care and sample matrix

| PFAS              | Ronneby |       |            |                       | Karlshamn |       |            |                       |
|-------------------|---------|-------|------------|-----------------------|-----------|-------|------------|-----------------------|
|                   | N       | %>LOQ | Range      | Median (IQR)          | N         | %>LOQ | Range      | Median (IRQ)          |
| <b>Serum</b>      |         |       |            |                       |           |       |            |                       |
| PFOA              | 103     | 100%  | 0.34-21.9  | 1.48 (1.02, 3.34 )    | 23        | 100%  | 0.29-1.65  | 0.72 (0.475, 0.99 )   |
| PFNA              | 103     | 99%   | <0.1-1.02  | 0.38 (0.26, 0.525 )   | 23        | 100%  | 0.18-0.86  | 0.32 (0.285, 0.465 )  |
| PFDA              | 103     | 94%   | <0.1-0.78  | 0.23 (0.15, 0.32 )    | 23        | 91%   | <0.1-0.5   | 0.21 (0.15, 0.255 )   |
| PFUnDA            | 103     | 91%   | <0.1-0.58  | 0.2 (0.15, 0.3 )      | 23        | 87%   | <0.1-0.4   | 0.23 (0.17, 0.32 )    |
| PFHxS             | 103     | 100%  | 0.38-189   | 11.4 (2.55, 35.7 )    | 23        | 100%  | 0.15-6.42  | 0.37 (0.28, 0.54 )    |
| PFHpS             | 103     | 91%   | <0.1-11    | 0.69 (0.18, 2.04 )    | 23        | 9%    | <0.1-0.34  | <0.1 (<0.1, <0.1 )    |
| PFOS              | 103     | 100%  | 1-310      | 18.3 (6.04, 43.6 )    | 23        | 100%  | 0.92-12.1  | 2.33 (1.92, 2.64 )    |
| <b>Colostrum</b>  |         |       |            |                       |           |       |            |                       |
| PFOA              | 73      | 99%   | <0.01-0.76 | 0.04 (0.03, 0.09 )    | 12        | 92%   | <0.01-0.03 | 0.02 (0.01, 0.02 )    |
| PFNA              | 73      | 51%   | <0.01-0.06 | 0.01 (<0.01, 0.01 )   | 12        | 8%    | <0.01-0.01 | <0.01 (<0.01, <0.01 ) |
| PFDA              | 73      | 3%    | <0.01-0.01 | <0.01 (<0.01, <0.01 ) | 12        | 0%    | -          | -                     |
| PFUnDA            | 73      | 11%   | <0.01-0.02 | <0.01 (<0.01, <0.01 ) | 12        | 0%    | -          | -                     |
| PFHxS             | 73      | 82%   | <0.01-3.46 | 0.16 (0.03, 0.54 )    | 12        | 0%    | -          | -                     |
| PFHpS             | 73      | 40%   | <0.01-0.24 | <0.01 (<0.01, 0.03 )  | 12        | 0%    | -          | -                     |
| PFOS              | 73      | 99%   | <0.01-2.66 | 0.14 (0.05, 0.36 )    | 12        | 75%   | <0.01-0.05 | 0.01 (0.00993, 0.02 ) |
| <b>Breastmilk</b> |         |       |            |                       |           |       |            |                       |
| PFOA              | 90      | 97%   | <0.01-0.24 | 0.04 (0.02, 0.07 )    | 19        | 84%   | <0.01-0.04 | 0.01 (0.01, 0.02 )    |
| PFNA              | 90      | 74%   | <0.01-0.02 | 0.01 (<0.01, 0.01 )   | 19        | 79%   | <0.01-0.01 | 0.01 (0.01, 0.01 )    |
| PFDA              | 90      | 2%    | <0.01-0.01 | <0.01 (<0.01, <0.01 ) | 19        | 0%    | -          | -                     |
| PFUnDA            | 90      | 3%    | <0.01-0.01 | <0.01 (<0.01, <0.01 ) | 19        | 0%    | -          | -                     |
| PFHxS             | 90      | 83%   | <0.01-1.76 | 0.125 (0.02, 0.348 )  | 19        | 11%   | <0.01-0.05 | <0.01 (<0.01, <0.01 ) |
| PFHpS             | 90      | 41%   | <0.01-0.14 | <0.01 (<0.01, 0.02 )  | 19        | 11%   | <0.01-0.01 | <0.01 (<0.01, <0.01 ) |
| PFOS              | 90      | 100%  | 0.01-2.1   | 0.185 (0.06, 0.442 )  | 19        | 95%   | <0.01-0.06 | 0.02 (0.015, 0.03 )   |

**Table S5:** Serum PFHxS cutoffs for each exposure group

| Exposure Category | PFHxS Cutoff (ng/ml) | N  |
|-------------------|----------------------|----|
| Background        | $X \leq 0.78$        | 25 |
| Intermediate      | $0.78 < X \leq 36$   | 76 |
| High              | $X > 36$             | 25 |

**Table S6:** Serum PFAS concentrations (ng/ml) by exposure group

| Statistic    | Exposure Group    |                    |                   |
|--------------|-------------------|--------------------|-------------------|
|              | Background        | Intermediate       | High              |
| <b>PFOA</b>  |                   |                    |                   |
| N (%>LOQ)    | 25 (100)          | 76 (100)           | 25 (100)          |
| Median (IQR) | 0.7 (0.5, 0.98)   | 1.29 (0.908, 1.84) | 5.06 (4.1, 6.01)  |
| Range        | 0.29-2.22         | 0.34-4.49          | 1.44-21.9         |
| Mean (SD)    | 0.786 (0.442)     | 1.55 (0.941)       | 5.79 (4.02)       |
| <b>PFNA</b>  |                   |                    |                   |
| N (%>LOQ)    | 25 (100)          | 76 (99)            | 25 (100)          |
| Median (IQR) | 0.31 (0.27, 0.44) | 0.38 (0.25, 0.47)  | 0.49 (0.31, 0.65) |
| Range        | 0.13-0.58         | <0.1-0.86          | 0.24-1.02         |
| Mean (SD)    | 0.346 (0.123)     | 0.384 (0.173)      | 0.501 (0.21)      |
| <b>PFHxS</b> |                   |                    |                   |
| N (%>LOQ)    | 25 (100)          | 76 (100)           | 25 (100)          |
| Median (IQR) | 0.37 (0.28, 0.51) | 6.02 (2.19, 14.9)  | 56.1 (49.9, 68.5) |
| Range        | 0.15-0.65         | 0.78-36            | 37-189            |
| Mean (SD)    | 0.392 (0.144)     | 9.92 (9.66)        | 64 (30.9)         |
| <b>PFOS</b>  |                   |                    |                   |
| N (%>LOQ)    | 25 (100)          | 76 (100)           | 25 (100)          |
| Median (IQR) | 2.49 (1.89, 3.05) | 11.3 (5.63, 21.5)  | 69.3 (47.9, 96)   |
| Range        | 0.92-4.51         | 1.89-79.3          | 30-310            |
| Mean (SD)    | 2.43 (0.957)      | 17 (16)            | 80.6 (56.5)       |



**Table S7:** Colostrum PFAS concentrations (ng/ml) by exposure group

| Statistic    | Exposure Group       |                     |                    |
|--------------|----------------------|---------------------|--------------------|
|              | Background           | Intermediate        | High               |
| <b>PFOA</b>  |                      |                     |                    |
| N (>LOQ)     | 13 (92)              | 56 (98)             | 16 (100)           |
| Median (IQR) | 0.02 (0.01, 0.03)    | 0.03 (0.02, 0.06)   | 0.145 (0.1, 0.202) |
| Range        | <0.01-0.08           | <0.01-0.14          | 0.04-0.76          |
| Mean (SD)    | 0.0244 (0.0191)      | 0.0432 (0.0328)     | 0.185 (0.168)      |
| <b>PFNA</b>  |                      |                     |                    |
| N (>LOQ)     | 13 (23)              | 56 (39)             | 16 (81)            |
| Median (IQR) | <0.01 (<0.01, <0.01) | <0.01 (<0.01, 0.01) | 0.01 (0.01, 0.01)  |
| Range        | <0.01-0.03           | <0.01-0.06          | <0.01-0.02         |
| Mean (SD)    | 0.00931 (0.00642)    | 0.0095 (0.00741)    | 0.0115 (0.00435)   |
| <b>PFHxS</b> |                      |                     |                    |
| N (>LOQ)     | 13 (0)               | 56 (79)             | 16 (100)           |
| Median (IQR) | <0.01 (<0.01, <0.01) | 0.1 (0.02, 0.212)   | 1.09 (0.687, 1.81) |
| Range        | <0.01-<0.01          | <0.01-0.78          | 0.3-3.46           |
| Mean (SD)    | 0.00658 (0.00155)    | 0.166 (0.19)        | 1.29 (0.827)       |
| <b>PFOS</b>  |                      |                     |                    |
| N (>LOQ)     | 13 (85)              | 56 (96)             | 16 (100)           |
| Median (IQR) | 0.02 (0.01, 0.02)    | 0.115 (0.04, 0.195) | 0.85 (0.428, 1.05) |
| Range        | <0.01-0.08           | <0.01-0.64          | 0.29-2.66          |
| Mean (SD)    | 0.0231 (0.0217)      | 0.156 (0.163)       | 0.907 (0.617)      |

**Table S8:** Breastmilk PFAS concentrations (ng/ml) by exposure group

| Statistic    | Exposure Group       |                      |                    |
|--------------|----------------------|----------------------|--------------------|
|              | Background           | Intermediate         | High               |
| <b>PFOA</b>  |                      |                      |                    |
| N (>LOQ)     | 21 (90)              | 68 (94)              | 20 (100)           |
| Median (IQR) | 0.02 (0.01, 0.02)    | 0.03 (0.02, 0.0425)  | 0.115 (0.08, 0.15) |
| Range        | <0.01-0.05           | <0.01-0.1            | 0.04-0.24          |
| Mean (SD)    | 0.0189 (0.0111)      | 0.0352 (0.0222)      | 0.125 (0.0577)     |
| <b>PFNA</b>  |                      |                      |                    |
| N (>LOQ)     | 21 (76)              | 68 (74)              | 20 (80)            |
| Median (IQR) | 0.01 (0.01, 0.01)    | 0.01 (<0.01, 0.01)   | 0.01 (0.01, 0.01)  |
| Range        | <0.01-0.01           | <0.01-0.02           | <0.01-0.02         |
| Mean (SD)    | 0.00975 (0.00062)    | 0.0102 (0.00221)     | 0.0102 (0.00243)   |
| <b>PFHxS</b> |                      |                      |                    |
| N (>LOQ)     | 21 (0)               | 68 (84)              | 20 (100)           |
| Median (IQR) | <0.01 (<0.01, <0.01) | 0.07 (0.01, 0.2)     | 0.83 (0.698, 1)    |
| Range        | <0.01-<0.01          | <0.01-0.57           | 0.34-1.76          |
| Mean (SD)    | 0.00707 (0)          | 0.122 (0.133)        | 0.892 (0.361)      |
| <b>PFOS</b>  |                      |                      |                    |
| N (>LOQ)     | 21 (95)              | 68 (100)             | 20 (100)           |
| Median (IQR) | 0.03 (0.01, 0.04)    | 0.135 (0.0575, 0.25) | 0.865 (0.51, 1.16) |
| Range        | <0.01-0.04           | 0.01-0.71            | 0.39-2.1           |
| Mean (SD)    | 0.0252 (0.0122)      | 0.176 (0.162)        | 0.888 (0.441)      |

**Table S9:** The average relative contribution of each PFAS to the sum of PFAS (PFOA, PFNA, PFDA, PFUnDA, PFHxS, PFHpS and PFOS), by matrix and exposure category.

| Percent of Total PFAS (%)               |            |              |       |
|-----------------------------------------|------------|--------------|-------|
| PFAS                                    | Background | Intermediate | High  |
| <b>Serum (N<sub>samples</sub>)</b>      | 25         | 76           | 25    |
| PFOA                                    | 18.0       | 8.0          | 3.70  |
| PFNA                                    | 8.0        | 2.5          | 0.36  |
| PFOS                                    | 54.0       | 55.0         | 50.00 |
| PFHxS                                   | 9.4        | 29.0         | 43.00 |
| Other PFAS                              | 3.7        | 1.7          | 0.94  |
| <b>Colostrum (N<sub>samples</sub>)</b>  | 13         | 56           | 16    |
| PFOA                                    | 29.0       | 16.0         | 7.40  |
| PFNA                                    | 12.0       | 5.1          | 0.65  |
| PFOS                                    | 25.0       | 36.0         | 36.00 |
| PFHxS                                   | 10.0       | 32.0         | 51.00 |
| Other PFAS                              | 7.8        | 3.7          | 1.30  |
| <b>Breastmilk (N<sub>samples</sub>)</b> | 21         | 68           | 20    |
| PFOA                                    | 24.0       | 14.0         | 6.40  |
| PFNA                                    | 13.0       | 5.3          | 0.59  |
| PFOS                                    | 31.0       | 45.0         | 44.00 |
| PFHxS                                   | 9.8        | 26.0         | 46.00 |
| Other PFAS                              | 7.2        | 3.2          | 1.00  |

**Table S10:** Estimated transfer efficiency (TE, 95% CI) by PFAS and lactation stage, calculated from a mixed-effects model with an interaction term between PFAS compound and lactation stage ( $N_{\text{participants}} = 126$  and  $N_{\text{observations}} = 776$ ). P-values are comparing transfer efficiency by lactation stage for each PFAS compound.

| PFAS  | TE <sub>C:S</sub> | TE <sub>B:S</sub> | p-value |
|-------|-------------------|-------------------|---------|
| PFOA  | 2.71 (2.44, 3.01) | 2.21 (2.01, 2.43) | <0.01   |
| PFNA  | 2.58 (2.32, 2.87) | 2.69 (2.45, 2.95) | 0.55    |
| PFHxS | 1.35 (1.22, 1.5)  | 1.21 (1.1, 1.32)  | 0.09    |
| PFOS  | 0.81 (0.73, 0.9)  | 1 (0.91, 1.1)     | <0.01   |

**Table S11:** Estimated transfer efficiency (TE, 95% CI) from serum into colostrum (TE<sub>C:S</sub>) by PFAS and exposure level, calculated from a mixed-effects model with an interaction term between PFAS and exposure group (N<sub>participants</sub> = 85 and N<sub>observations</sub> = 340). P-values are for each PFAS compound and are relative to the background exposure group.

| Exposure Category | TE <sub>C:S</sub> | p-value |
|-------------------|-------------------|---------|
| <b>PFOA</b>       |                   |         |
| Background        | 2.75 (2.05, 3.68) | -       |
| Intermediate      | 2.61 (2.27, 3.01) | 0.75    |
| High              | 3.08 (2.37, 4.01) | 0.56    |
| <b>PFNA</b>       |                   |         |
| Background        | 2.4 (1.79, 3.21)  | -       |
| Intermediate      | 2.65 (2.3, 3.05)  | 0.54    |
| High              | 2.54 (1.95, 3.3)  | 0.78    |
| <b>PFHxS</b>      |                   |         |
| Background        | 1.73 (1.3, 2.32)  | -       |
| Intermediate      | 1.2 (1.04, 1.38)  | 0.03    |
| High              | 1.72 (1.32, 2.23) | 0.96    |
| <b>PFOS</b>       |                   |         |
| Background        | 0.67 (0.5, 0.9)   | -       |
| Intermediate      | 0.78 (0.67, 0.89) | 0.37    |
| High              | 1.11 (0.86, 1.45) | 0.01    |

**Table S12:** Estimated transfer efficiency (TE, 95% CI) from serum into breastmilk (TE<sub>B:S</sub>) by PFAS and exposure level, calculated from a mixed-effects model with an interaction term between PFAS and exposure group (N<sub>participants</sub> = 109 and N<sub>observations</sub> = 436). P-values are for each PFAS compound and are relative to the background exposure group.

| Exposure Category | TE <sub>B:S</sub> | p-value |
|-------------------|-------------------|---------|
| <b>PFOA</b>       |                   |         |
| Background        | 2.42 (2.01, 2.91) | -       |
| Intermediate      | 2.16 (1.95, 2.39) | 0.3     |
| High              | 2.17 (1.79, 2.62) | 0.42    |
| <b>PFNA</b>       |                   |         |
| Background        | 2.99 (2.49, 3.6)  | -       |
| Intermediate      | 2.8 (2.52, 3.1)   | 0.54    |
| High              | 2.06 (1.71, 2.5)  | 0.01    |
| <b>PFHxS</b>      |                   |         |
| Background        | 1.89 (1.57, 2.27) | -       |
| Intermediate      | 1 (0.9, 1.11)     | < 0.01  |
| High              | 1.42 (1.17, 1.71) | 0.03    |
| <b>PFOS</b>       |                   |         |
| Background        | 0.96 (0.79, 1.15) | -       |
| Intermediate      | 0.98 (0.88, 1.08) | 0.84    |
| High              | 1.15 (0.95, 1.39) | 0.18    |

## Supplemental Figures

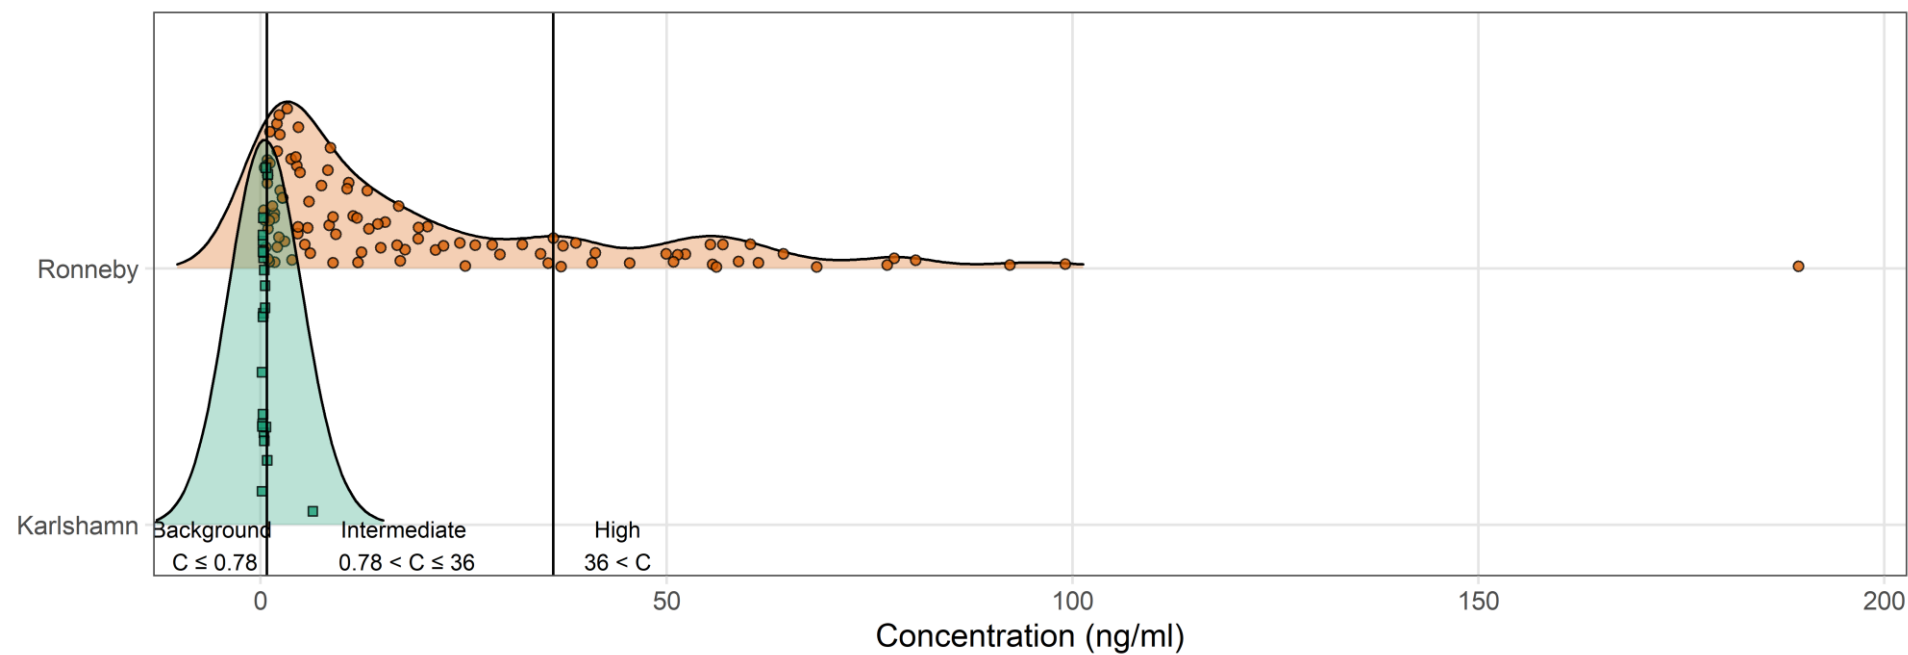

**Figure S1:** Exposure category cutoffs by serum PFHxS concentrations, illustrated by area (Ronneby: n = 103; Karlshamn: n = 23)

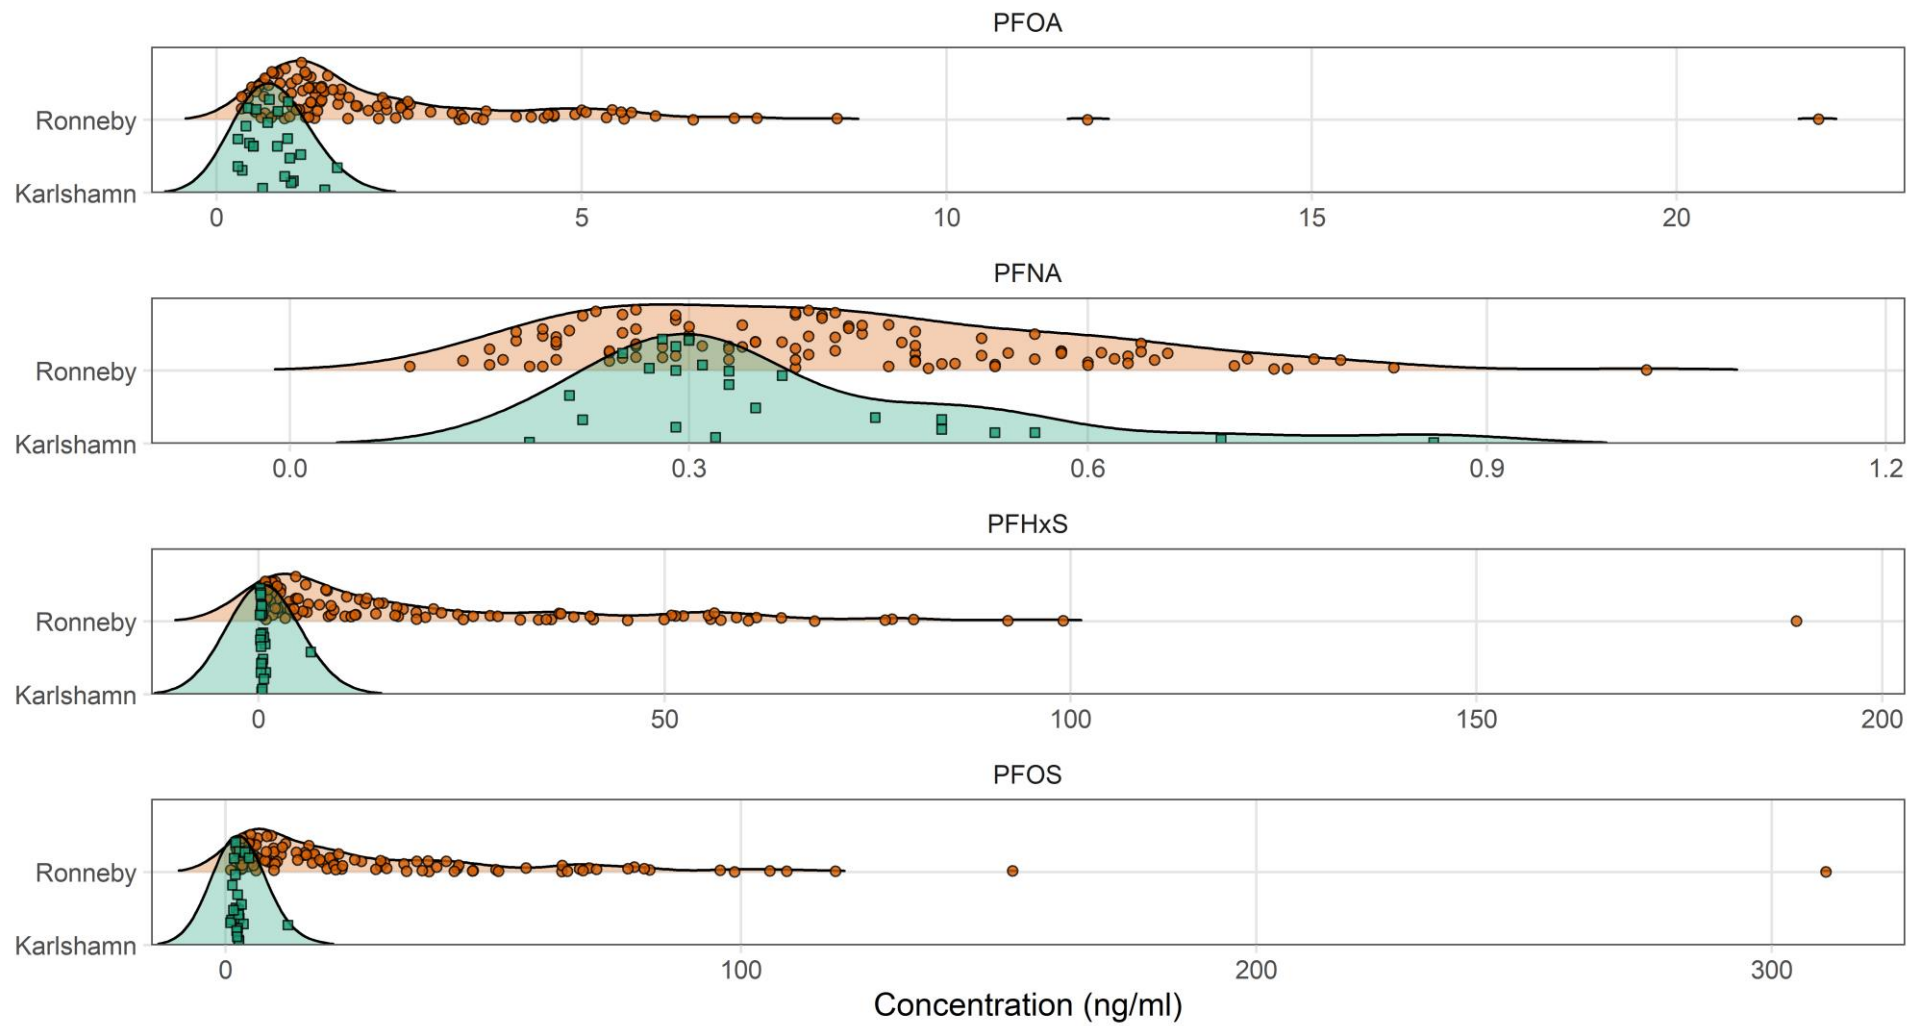

**Figure S2:** Serum PFAS concentrations by area (Ronneby: n = 103; Karlshamn: n = 23)



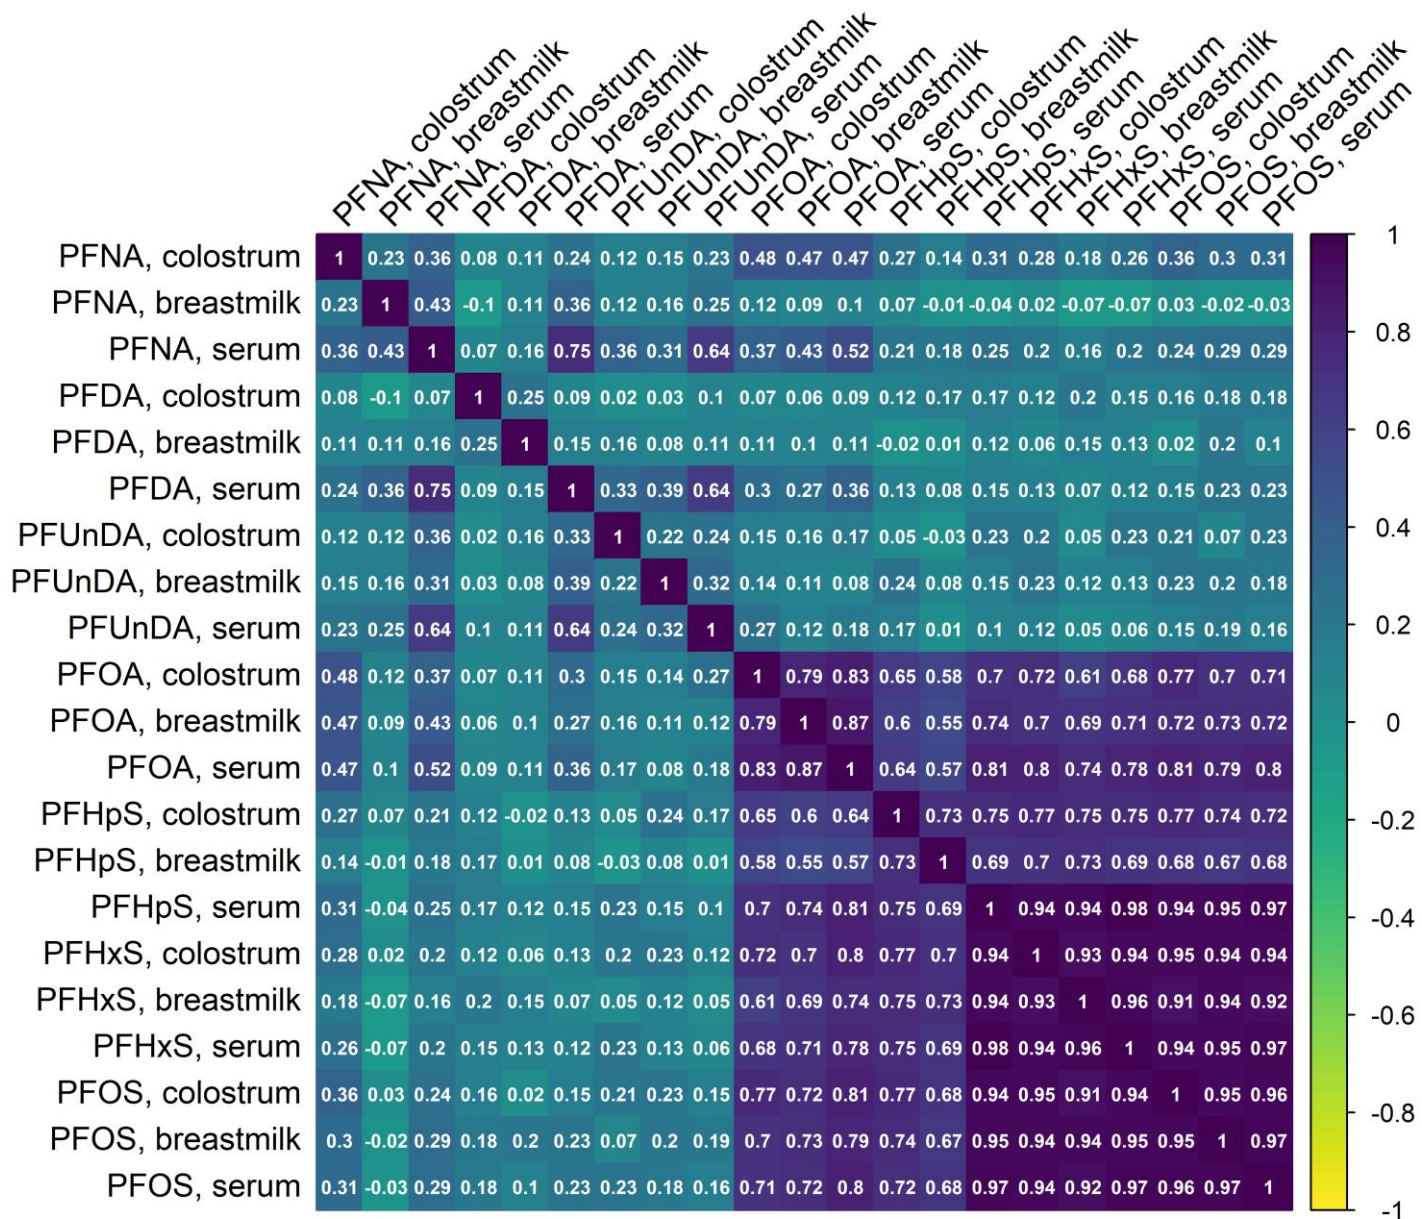

**Figure S3:** Spearman correlations across PFAS and matrices ( $N_{\text{participants}} = 126$  and  $N_{\text{observations}} = 2240$ )

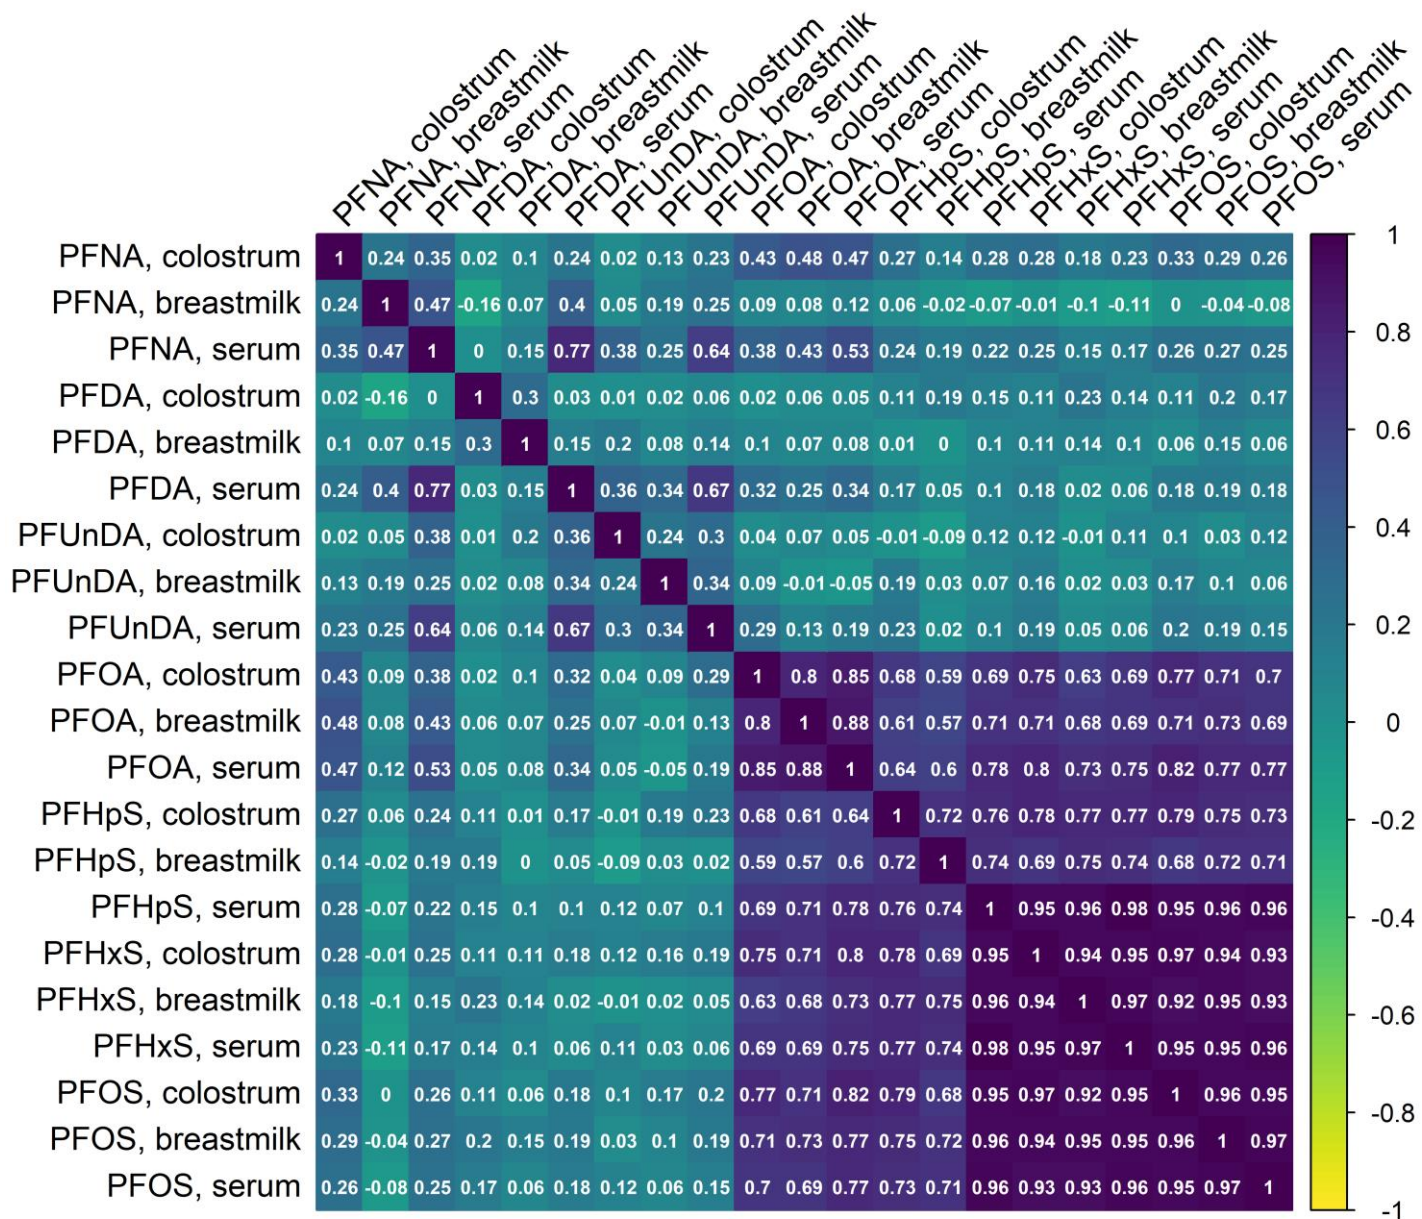

**Figure S4:** Spearman correlations across PFAS and matrices, limited to participants in the intermediate and high exposure groups ( $N_{\text{participants}} = 101$  and  $N_{\text{observations}} = 1827$ )

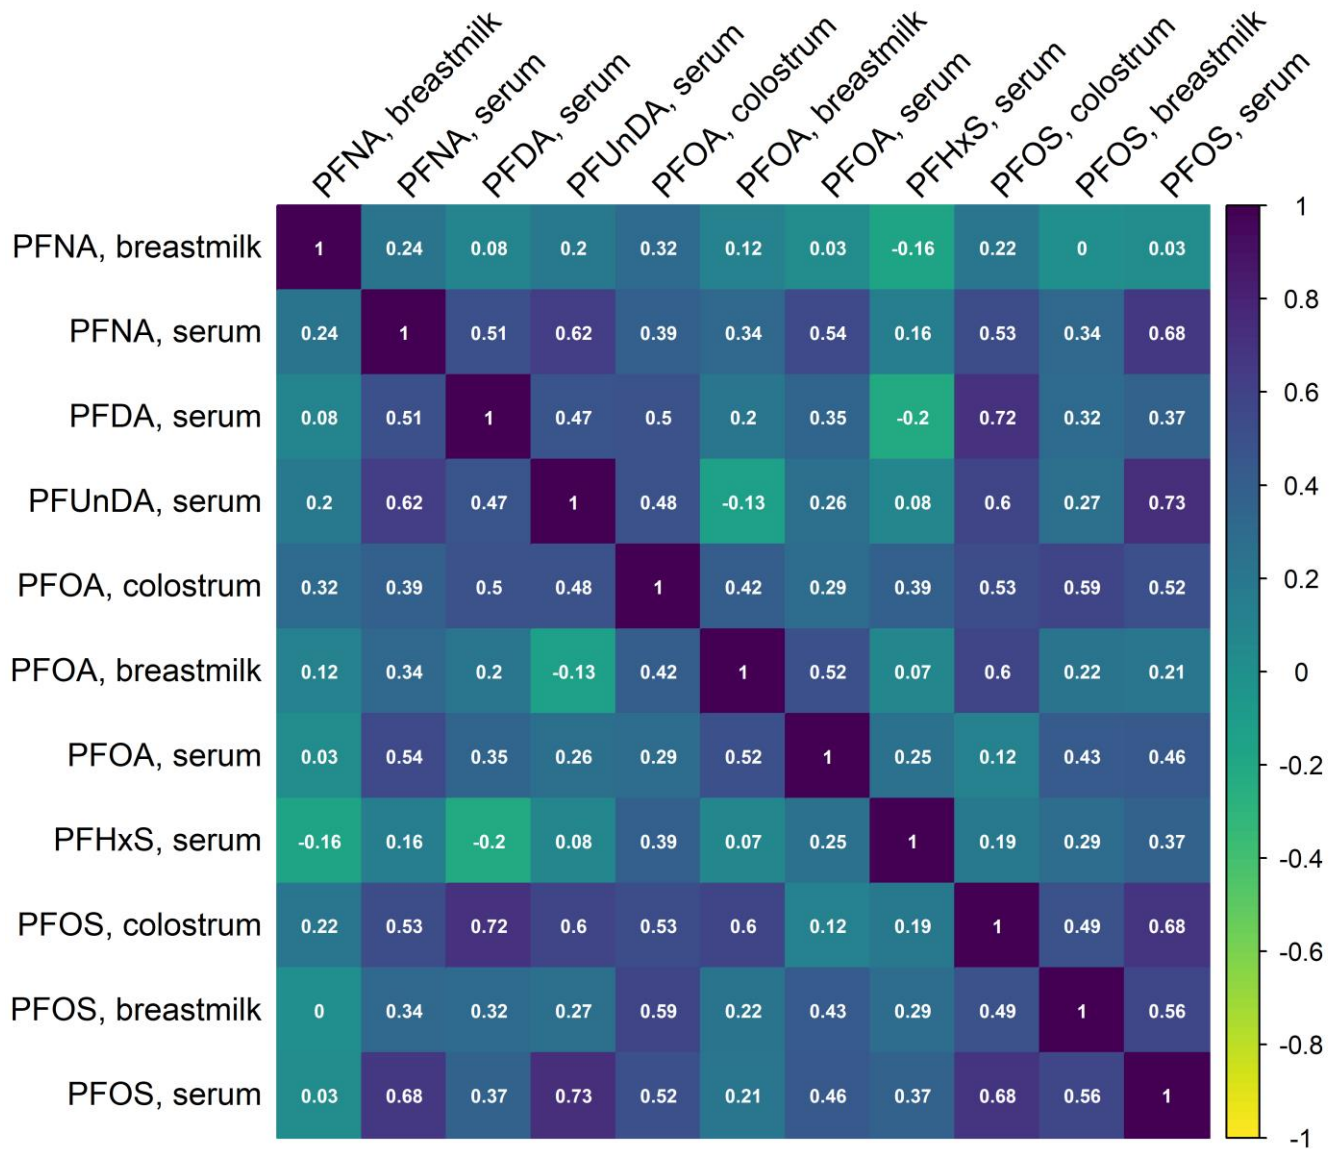

**Figure S5:** Spearman correlations across PFAS and matrices, limited to participants in the background exposure group ( $N_{\text{participants}} = 25$  and  $N_{\text{observations}} = 239$ ). Because of the small sample size, this correlation plot excludes PFAS measurements where the majority of measurements were less than the LOQ.
