# Supplementary material
Source: PubMed Central journal article supplement (PMC9869870)
Supplement: ehp11292.smcontents.508.pdf [file ehp11292.smcontents.508.pdf]

**Note to readers with disabilities:** *EHP* strives to ensure that all journal content is accessible to all readers. However, some figures and Supplemental Material published in *EHP* articles may not conform to [508 standards](#) due to the complexity of the information being presented. If you need assistance accessing journal content, please contact [ehp508@niehs.nih.gov](mailto:ehp508@niehs.nih.gov). Our staff will work with you to assess and meet your accessibility needs within 3 working days.

### **Supplemental Material**

#### **Estimated Transfer of Perfluoroalkyl Substances (PFAS) from Maternal Serum to Breast Milk in Women Highly Exposed from Contaminated Drinking Water: A Study in the Ronneby Mother–Child Cohort**

Annelise J. Blomberg, Erika Norén, Line S. Haug, Christian Lindh, Azemira Sabaredzovic, Daniela Pineda, Kristina Jakobsson, and Christel Nielsen

#### **Table of Contents**

**Table S1.** Between-run precision for four quality control (QC) samples and between-batch precision for 164 duplicate samples, expressed as the mean and coefficient of variation (CV, %).

**Table S2.** Study population characteristics for women who did vs. did not provide provide at least one milk sample, limited to the 211 women with a serum delivery sample and displayed as either N (%) or Mean  $\pm$  SD.

**Table S3.** Serum PFAS concentrations at delivery for women who did vs. did not provide provide at least one milk sample, limited to the 211 women with a serum delivery sample and displayed as median [IQR] or N (%).

**Table S4.** PFAS concentrations (ng/ml) by location of maternal care and sample matrix.

**Table S5.** Serum PFHxS cutoffs for each exposure group.

**Table S6.** Serum PFAS concentrations (ng/ml) by exposure group.

**Table S7.** Colostrum PFAS concentrations (ng/ml) by exposure group.

**Table S8.** Breastmilk PFAS concentrations (ng/ml) by exposure group.

**Table S9.** The average relative contribution of each PFAS to the sum of PFAS (PFOA, PFNA, PFDA, PFUnDA, PFHxS, PFHpS and PFOS), by matrix and exposure category.

**Table S10.** Estimated transfer efficiency (TE, 95% CI) by PFAS and lactation stage, calculated from a mixed-effects model with an interaction term between PFAS compound and lactation stage ( $N_{\text{participants}} = 126$  and  $N_{\text{observations}} = 776$ ). P-values are comparing transfer efficiency by lactation stage for each PFAS compound.

**Table S11.** Estimated transfer efficiency (TE, 95% CI) from serum into colostrum ( $TE_{C:S}$ ) by PFAS and exposure level, calculated from a mixed-effects model with an interaction term between PFAS and exposure group ( $N_{\text{participants}} = 85$  and  $N_{\text{observations}} = 340$ ). P-values are for each PFAS compound and are relative to the background exposure group.

**Table S12.** Estimated transfer efficiency (TE, 95% CI) from serum into breastmilk ( $TE_{B:S}$ ) by PFAS and exposure level, calculated from a mixed-effects model with an interaction term between PFAS and exposure group ( $N_{\text{participants}} = 109$  and  $N_{\text{observations}} = 436$ ). P-values are for each PFAS compound and are relative to the background exposure group.

**Figure S1.** Exposure category cutoffs by serum PFHxS concentrations, illustrated by area (Ronneby:  $n = 103$ ; Karlshamn:  $n = 23$ ).

**Figure S2.** Serum PFAS concentrations by area (Ronneby:  $n = 103$ ; Karlshamn:  $n = 23$ ).

**Figure S3.** Spearman correlations across PFAS and matrices ( $N_{\text{participants}} = 126$  and  $N_{\text{observations}} = 2240$ ).

**Figure S4.** Spearman correlations across PFAS and matrices, limited to participants in the intermediate and high exposure groups ( $N_{\text{participants}} = 101$  and  $N_{\text{observations}} = 1827$ ).

**Figure S5.** Spearman correlations across PFAS and matrices, limited to participants in the background exposure group ( $N_{\text{participants}} = 25$  and  $N_{\text{observations}} = 239$ ). Because of the small sample size, this correlation plot excludes PFAS measurements where the majority of measurements were less than the LOQ.
